# Supplementary material for: The common oncogenomic program of NOTCH1 and NOTCH3 signaling in T-cell acute lymphoblastic leukemia
Source: PubMed Central journal article supplement (PMC5638296; doi:10.1371/journal.pone.0185762), 2017-10-12
Supplement: pone.0185762.s002.pdf [file pone.0185762.s002.pdf]

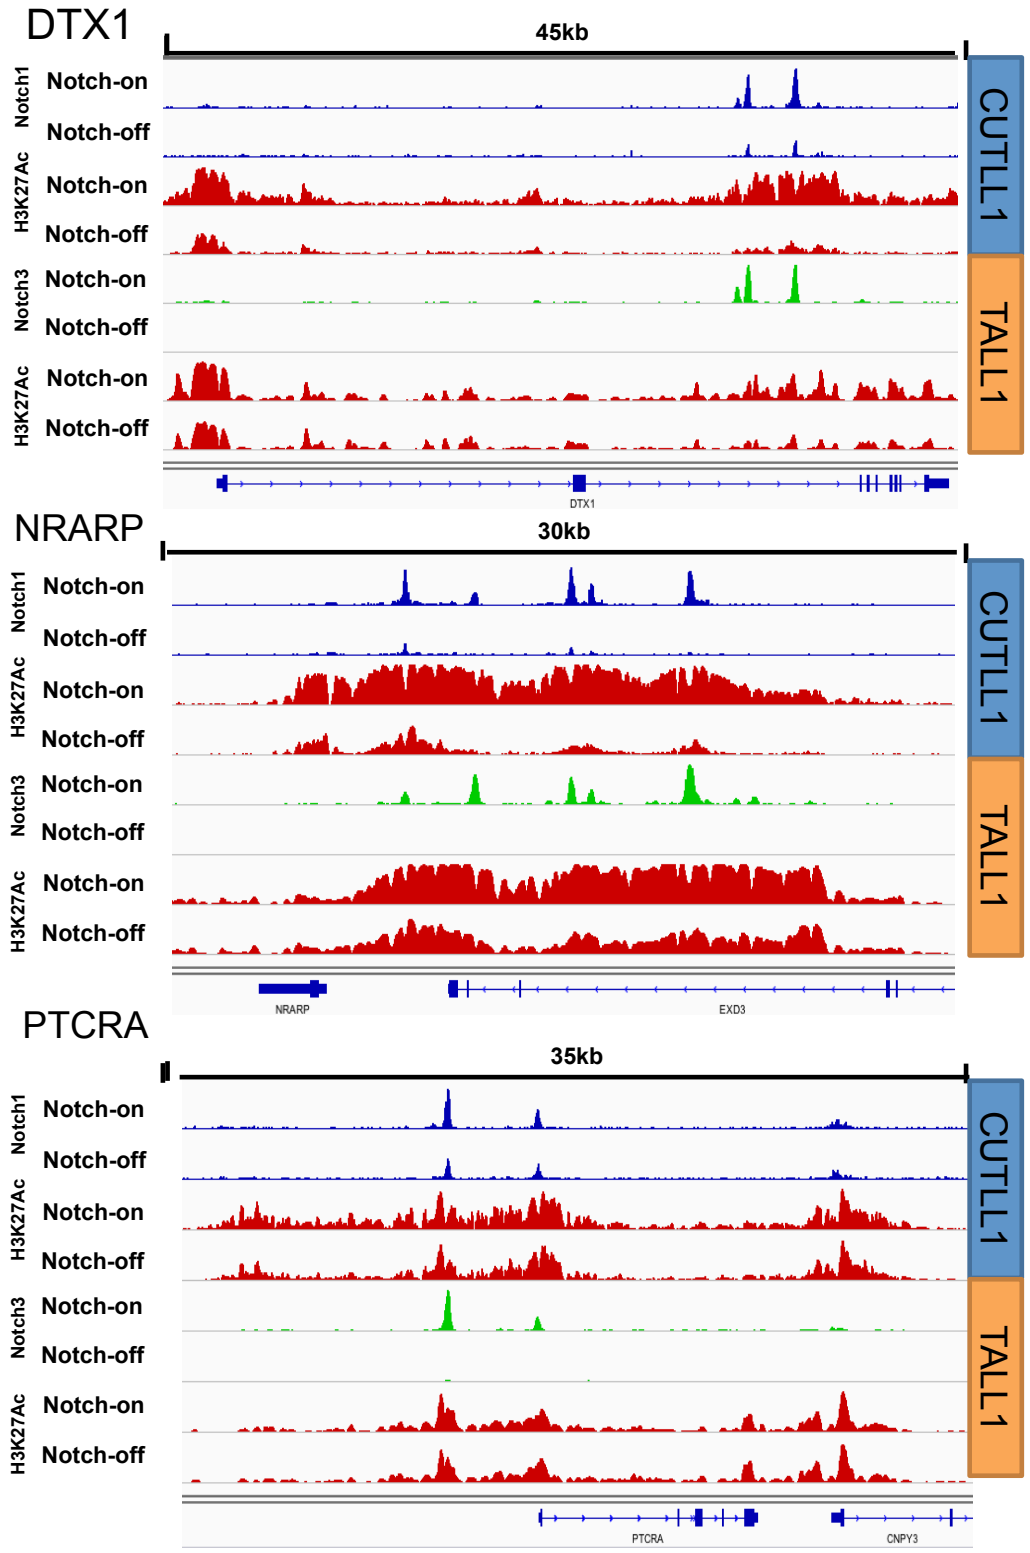

Supplemental Figure 2. IGV tracks showing similar chromatin and Notch-binding chromatin landscapes near *DTX1*, *NRARP*, and *PTCRA* in TALL1 and CUTLL1 cells.
