# Supplementary material for: The common oncogenomic program of NOTCH1 and NOTCH3 signaling in T-cell acute lymphoblastic leukemia
Source: PubMed Central journal article supplement (PMC5638296; doi:10.1371/journal.pone.0185762), 2017-10-12
Supplement: pone.0185762.s003.pdf [file pone.0185762.s003.pdf]

A

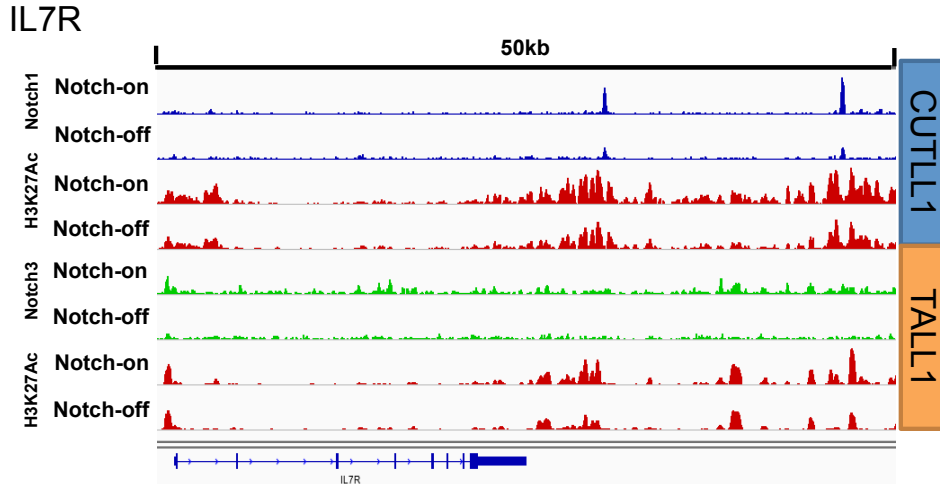

B

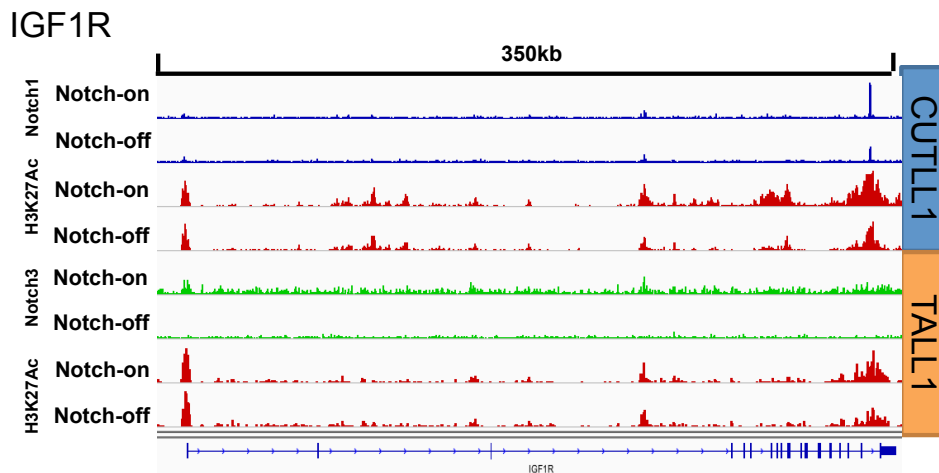

C

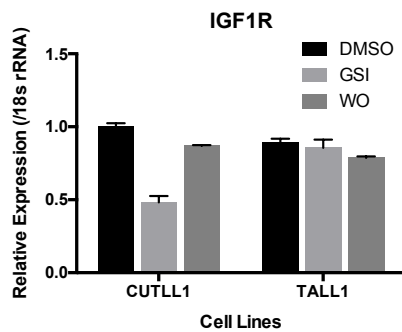

D

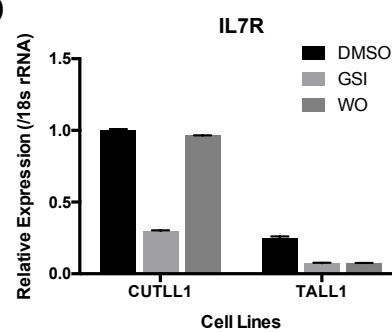

**Supplemental Figure 3. Notch binding, *IL7R* and *IGF1R* enhancer landscapes, and *IL7R* and *IGF1R* expression in CUTLL1 and TALL1 cells. A, B. IGV tracks showing NOTCH1 and NOTCH3 binding and H3K27ac chromatin landscapes near *IL7R* and *IGF1R*. C, D. qRT-PCR analysis of *IGF1R* and *IL7R* expression in CUTLL1 and TALL1 cells.**
