# Supplementary material for: The common oncogenomic program of NOTCH1 and NOTCH3 signaling in T-cell acute lymphoblastic leukemia
Source: PubMed Central journal article supplement (PMC5638296; doi:10.1371/journal.pone.0185762), 2017-10-12
Supplement: pone.0185762.s004.pdf [file pone.0185762.s004.pdf]

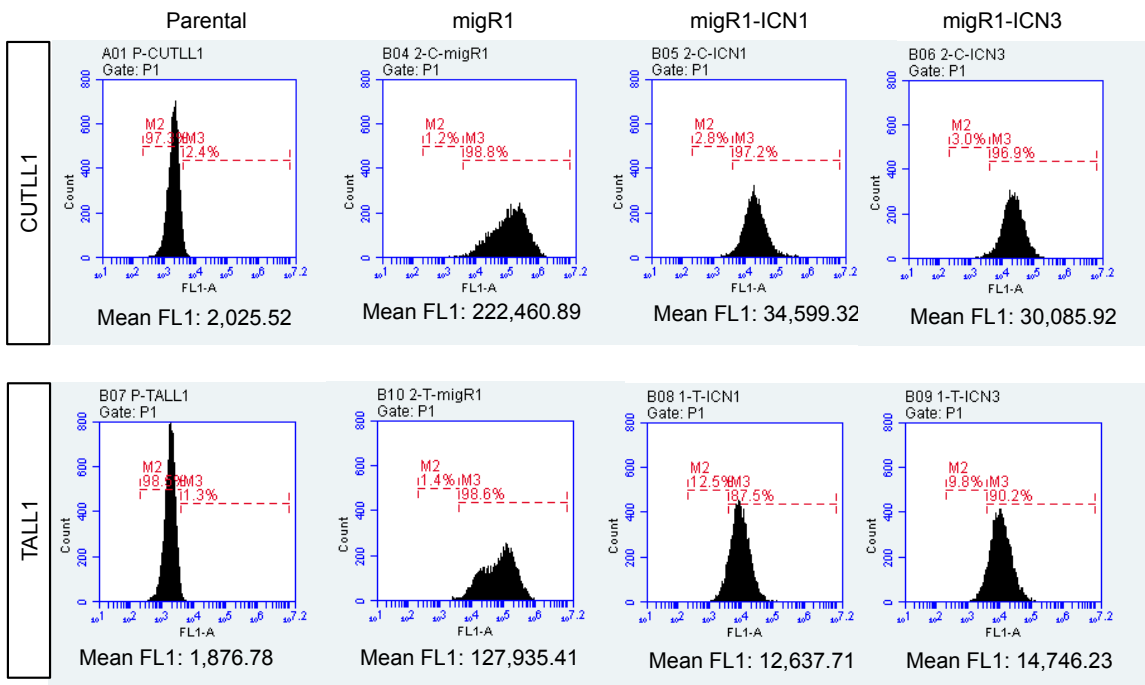

**Supplemental Figure 4. Flow cytometric analysis of GFP expression in CUTLL1 and TALL1 cells transduced with the indicated retroviruses.**
