# Supplementary material for: The common oncogenomic program of NOTCH1 and NOTCH3 signaling in T-cell acute lymphoblastic leukemia
Source: PubMed Central journal article supplement (PMC5638296; doi:10.1371/journal.pone.0185762), 2017-10-12
Supplement: pone.0185762.s005.pdf [file pone.0185762.s005.pdf]

**Supplemental Table 1: qPCR primers**

|                  |   | Sequence                           |
|------------------|---|------------------------------------|
| Notch1a          | F | 5' – TGGACCAGATTGGGGAGTTC – 3'     |
|                  | R | 5' – GCACACTCGTCTGTGTTGAC – 3'     |
| Notch1b          | F | 5' – CAACATCCAGGACAACATGG – 3'     |
|                  | R | 5' – GGACTTGCCCAGGTCATCTA – 3'     |
| Notch3a          | F | 5' – TGGCGACCTCACTTACGACT – 3'     |
|                  | R | 5' – CACTGGCAGTTATAGGTGTTGAC – 3'  |
| Notch3b          | F | 5' – GTAGAGGGCATGGTGGGAAGA – 3'    |
|                  | R | 5' – AAGTGGTCCAACAGCAGCTT – 3'     |
| MYC              | F | 5' – GGCTCCTGGCAAAAGGTCA – 3'      |
|                  | R | 5' – CTGCGTAGTTGTGCTGATGT – 3'     |
| GAPDH            | F | 5' – GAAGGTGAAGGTCGGAGTCAAC – 3'   |
|                  | R | 5' – TGGAAGATGGTGTGGGATTTTC – 3'   |
| 18s rRNA         | F | 5' – TAGAGTGTTCAAAGCAGGCCC – 3'    |
|                  | R | 5' – CCAACAAAATAGAACCG CGGT – 3'   |
| Negative Control | F | 5' – AATGCTGGGCTTCCAAGGA – 3'      |
|                  | R | 5' – GACCTTGGTGACTGTTGAGGAAAC – 3' |
